# Supplementary material for: Enhanced drug delivery to cancer cells through a pH-sensitive polycarbonate platform
Source: Royal Society of Chemistry journal article supplement (doi:10.1039/d2bm01626e), 2022-12-15
Supplement: d2bm01626e1.pdf [file d2bm01626e1.pdf]

## Supplementary information

### Enhanced drug delivery to cancer cells through a pH-sensitive polycarbonate platform

Maria C. Arno<sup>a,b\*</sup>, Joshua D. Simpson<sup>c,d,e</sup>, Lewis D. Blackman<sup>f</sup>, Ruairi P. Brannigan<sup>f</sup>,

Kristofer J. Thurecht<sup>c,d,e</sup>, Andrew P. Dove<sup>a\*</sup>

- School of Chemistry, University of Birmingham, Edgbaston, Birmingham, B15 2TT, United Kingdom
- Institute of Cancer and Genomic Sciences, University of Birmingham, Edgbaston, Birmingham, B15 2TT, United Kingdom
- Australian Institute for Bioengineering and Nanotechnology, The University of Queensland, St. Lucia, Queensland 4072, Australia
- Centre for Advanced Imaging, The University of Queensland, St. Lucia, Queensland 4072, Australia
- ARC Centre of Excellence in Convergent Bio-Nano Science and Technology, The University of Queensland, St. Lucia, Queensland 4072, Australia
- Department of Chemistry, The University of Warwick, Coventry CV4 7AL, United Kingdom

#### Supplementary data

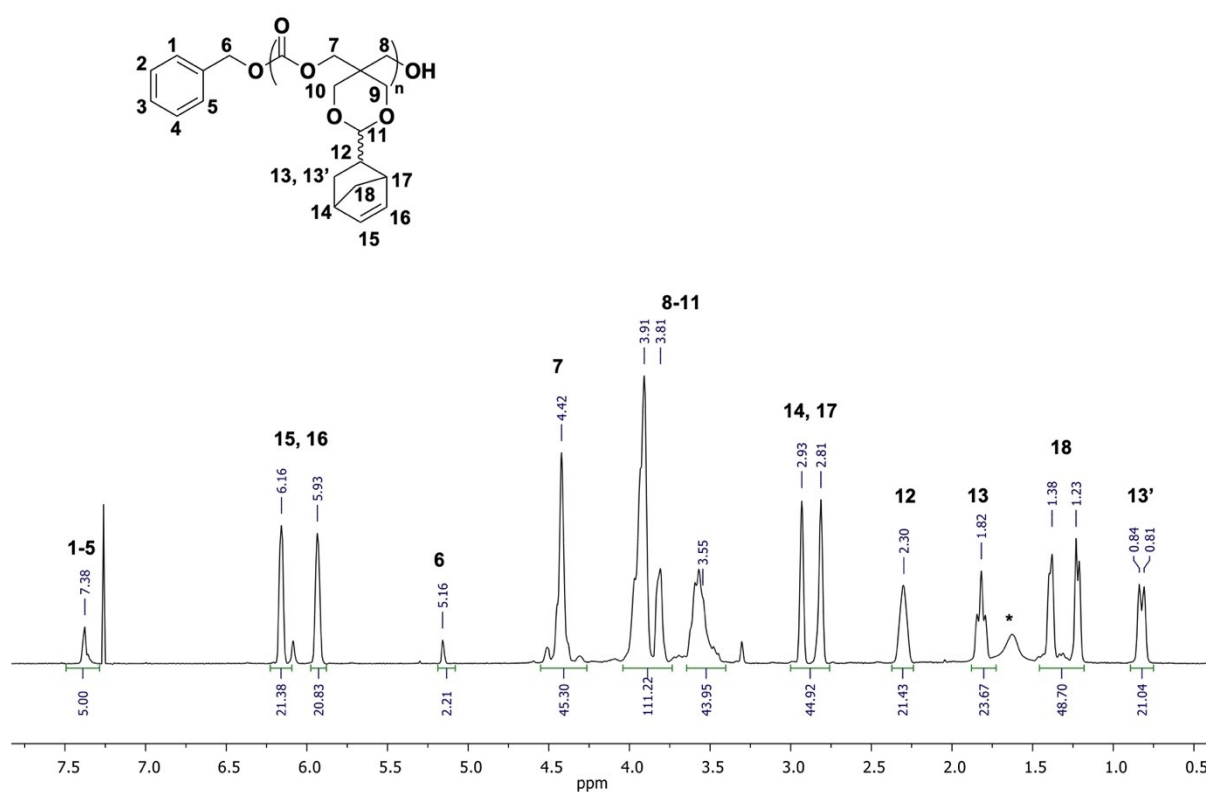

**Figure S1.**  $^1\text{H}$  NMR spectrum of poly(NTC) (PNTC) (DP20) initiated from benzyl alcohol (400 MHz,  $\text{CDCl}_3$ ). \*  $\text{H}_2\text{O}$ .

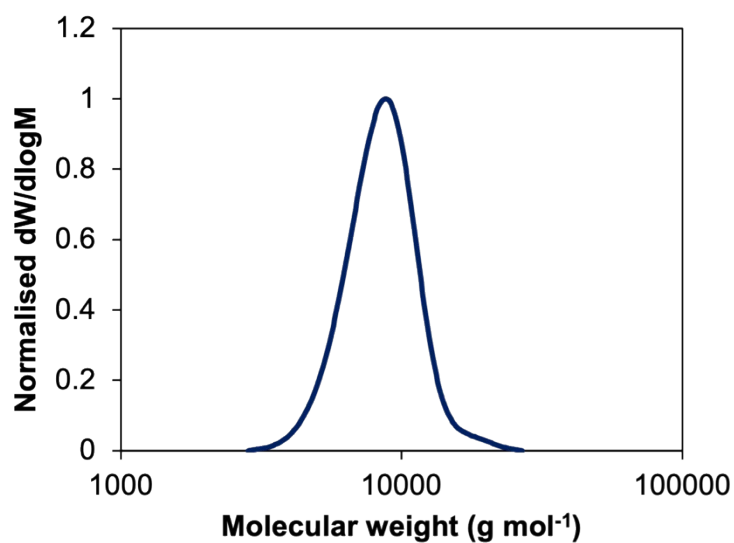

**Figure S2.** Size exclusion chromatograms of PNTC (DP 20), RI detection. Eluent:  $\text{CHCl}_3$ , standard: PS.

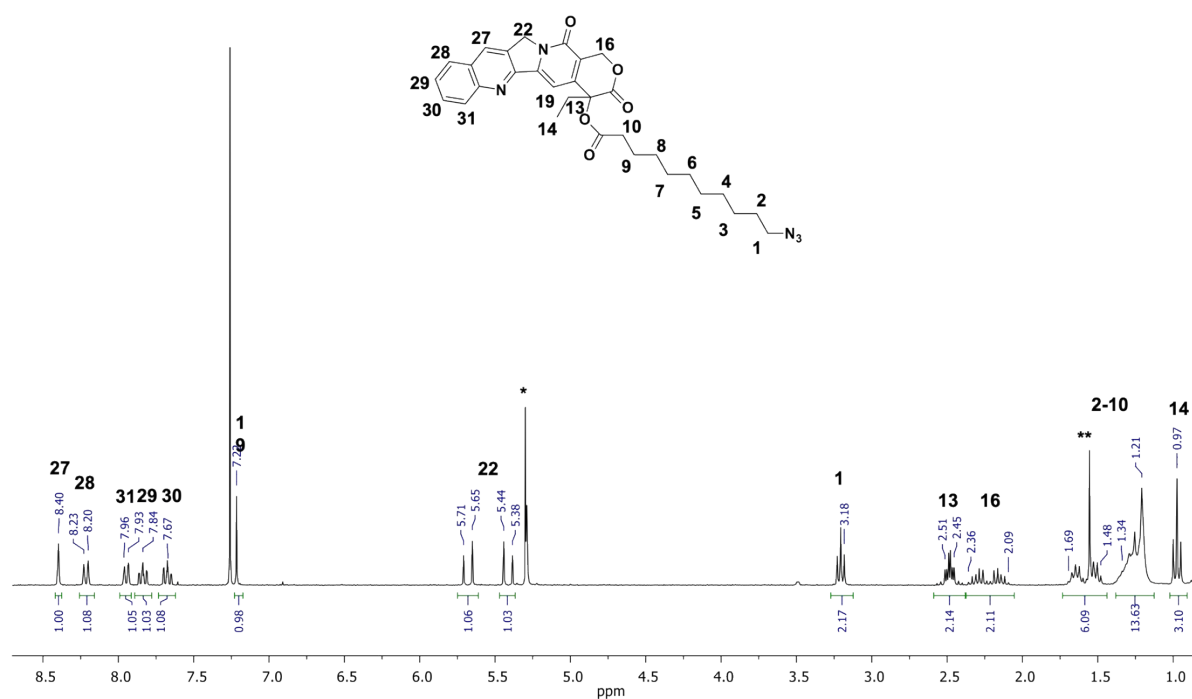

**Figure S3.**  $^1\text{H}$  NMR spectrum of CPT-azide (400 MHz,  $\text{CDCl}_3$ ). \*  $\text{CH}_2\text{Cl}_2$ , \*\*  $\text{H}_2\text{O}$ .

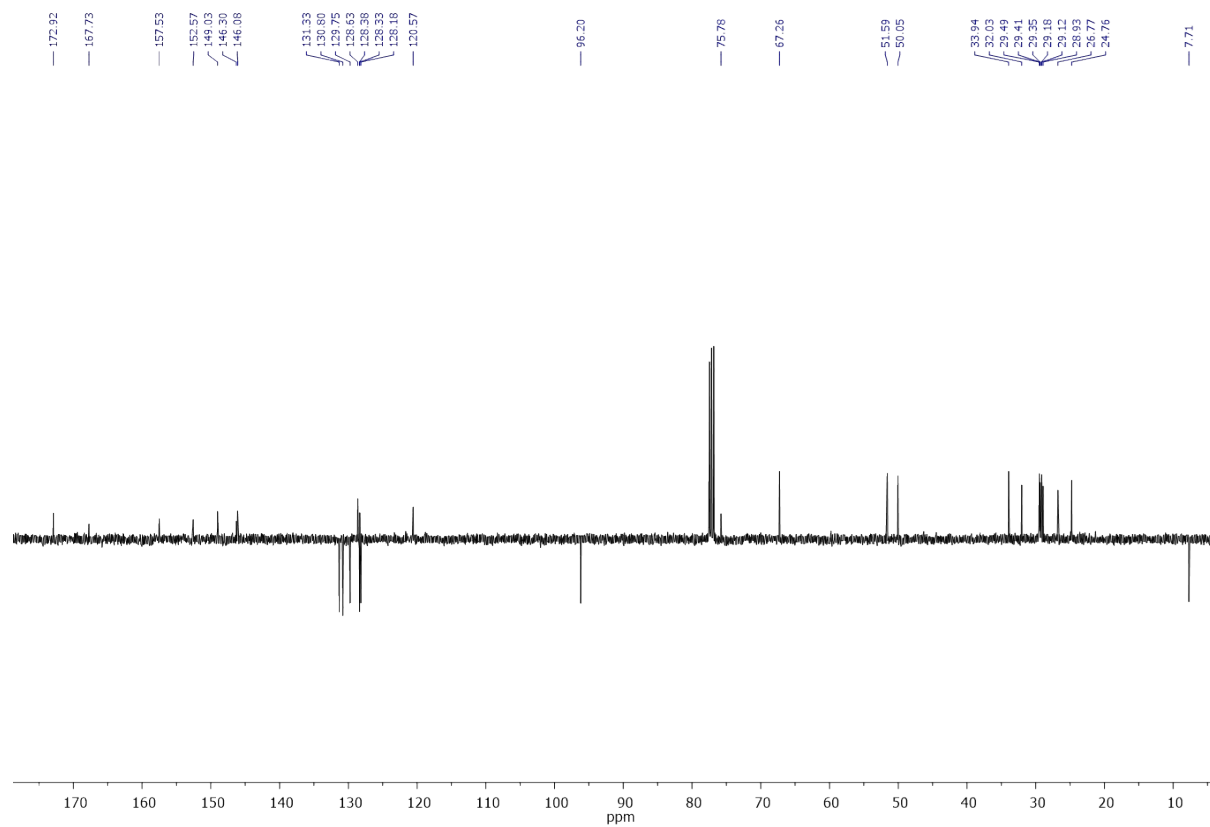

**Figure S4.**  $^{13}\text{C}$  NMR spectrum of CPT-azide (400 MHz,  $\text{CDCl}_3$ ).

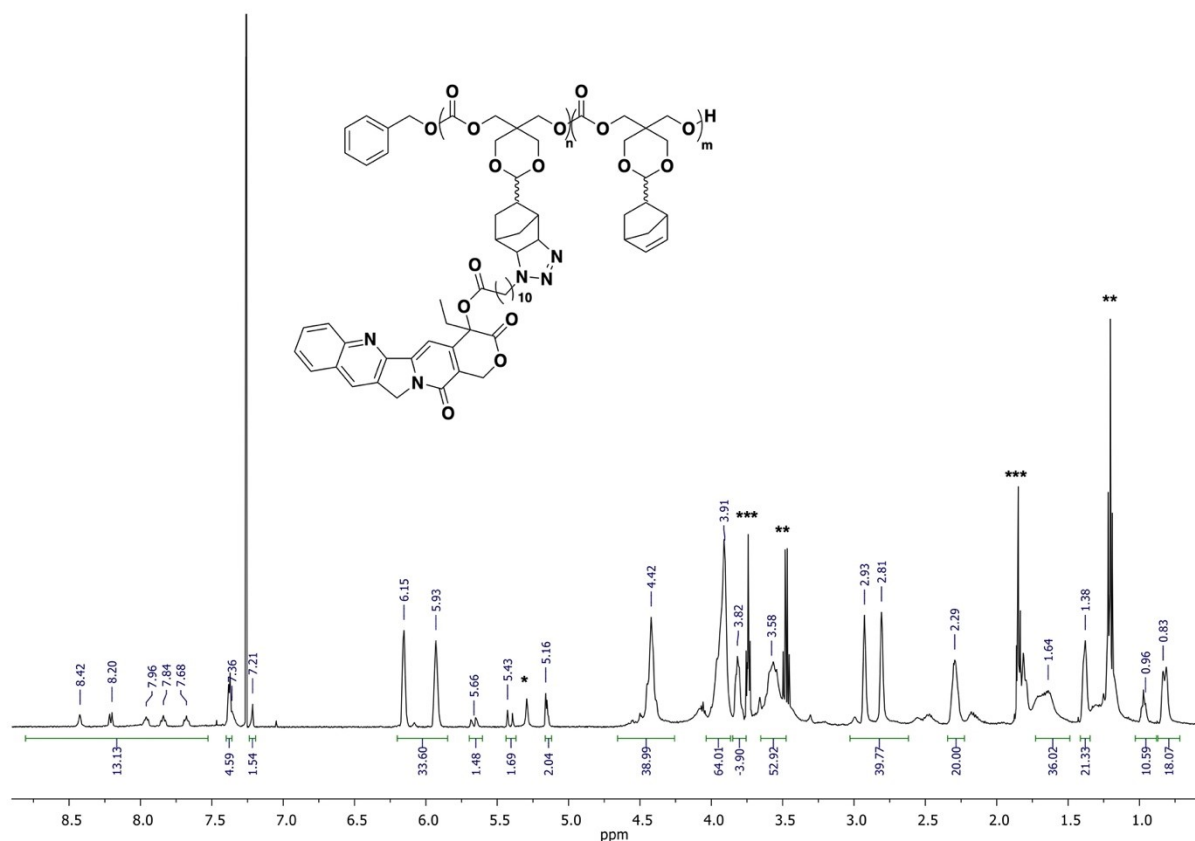

**Figure S5.** <sup>1</sup>H NMR spectrum of PNTC<sub>20</sub>-g-CPT (500 MHz, CDCl<sub>3</sub>). Integration of the aromatic region for camptothecin protons indicates a 15% functionalization (13 proton/5 = 2.6 units of CPT per polymer chain). \* CH<sub>2</sub>Cl, \*\* Et<sub>2</sub>O, \*\*\* THF.

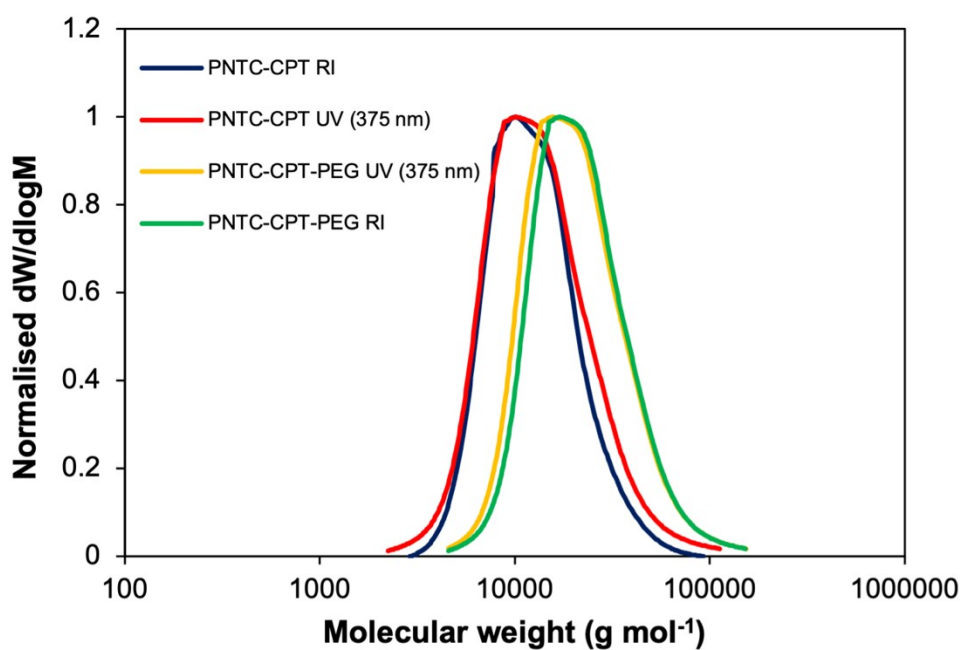

**Figure S6.** Size exclusion chromatograms of PNTC-g-CPT conjugate (RI and UV detection) and PNTC-g-CPT-g-PEG (RI and UV detection). Eluent: THF, standard: PS.

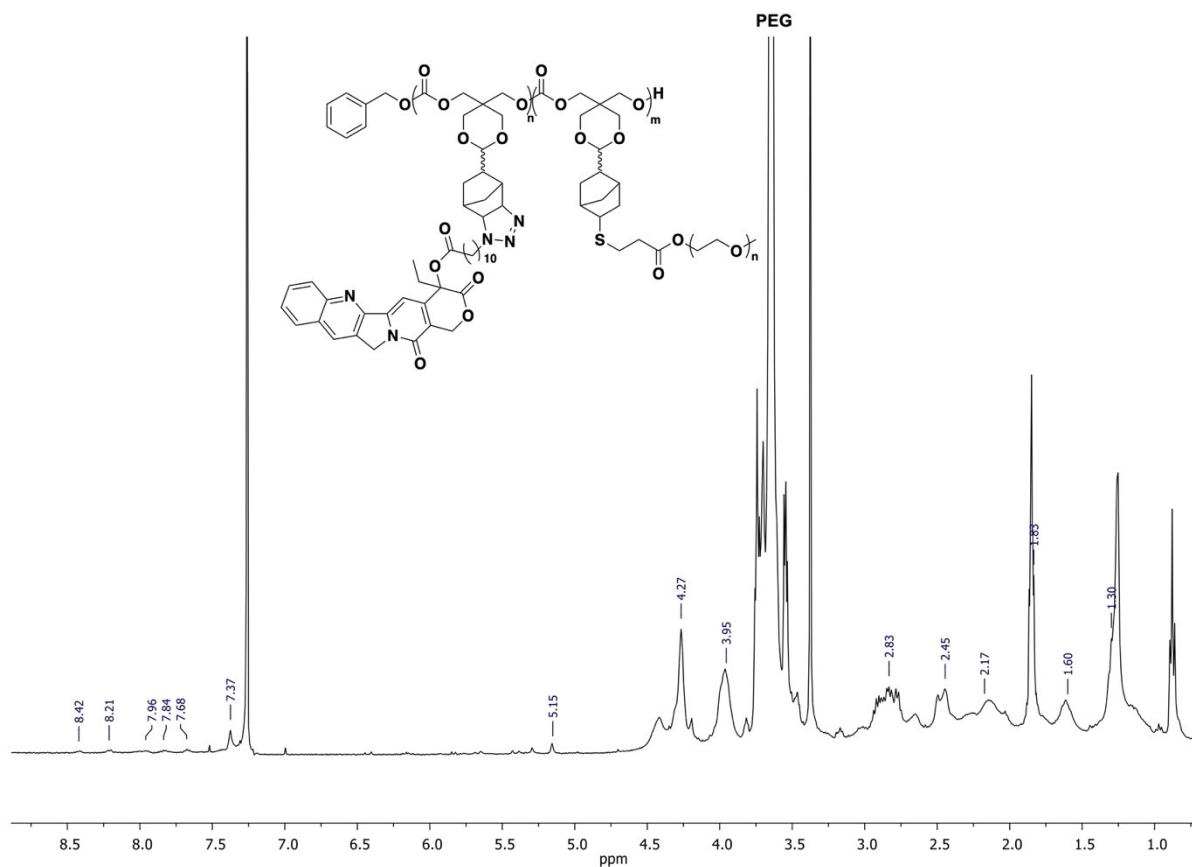

**Figure S7.**  $^1\text{H}$  NMR spectrum of PNTC-g-CPT-g-PEG (500 MHz,  $\text{CDCl}_3$ ).

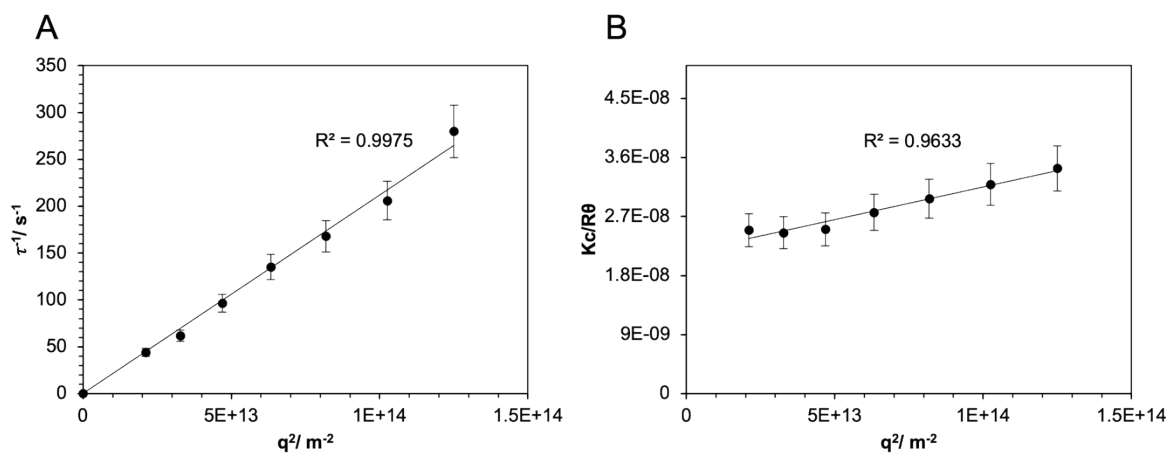

**Figure S8.** Multi-angle light scattering analysis of PNTC-g-CPT-g-PEG<sub>550</sub> assemblies in water at pH 7 (1 mg/mL). A) shows multiple angle DLS data and B) shows the partial Zimm plot from SLS analysis ( $R_g/R_h = 0.992$ ).

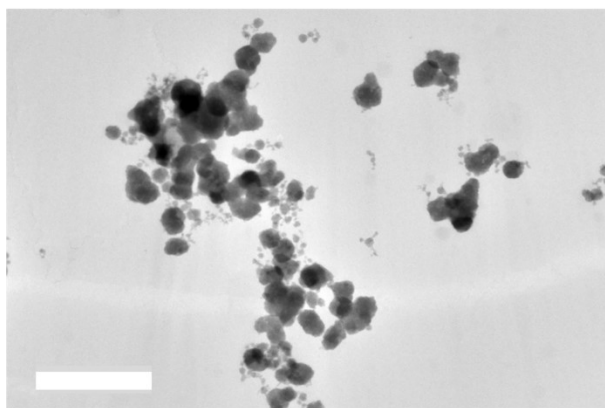

**Figure S9.** TEM micrograph of PNTC-g-CTP-g-PEG assemblies in water. 1% uranyl acetate was used as negative stain. Scale bar = 500 nm.

**Table S1.** Structural parameters of PNTC-g-CPT-g-PEG assemblies in water at different pH ( $1 \text{ mg mL}^{-1}$ ) analysed by Multi Angle DLS and SLS.

| pH  | $N_{\text{agg}}$ | $R_g/R_h$ | $R_h$ (nm) |
|-----|------------------|-----------|------------|
| 7.4 | 1550             | 0.99      | 104        |
| 6.0 | 1190             | 1.01      | 161        |
| 5.0 | 4260             | 2.52      | 112        |
| 4.0 | 4230             | 2.12      | 131        |

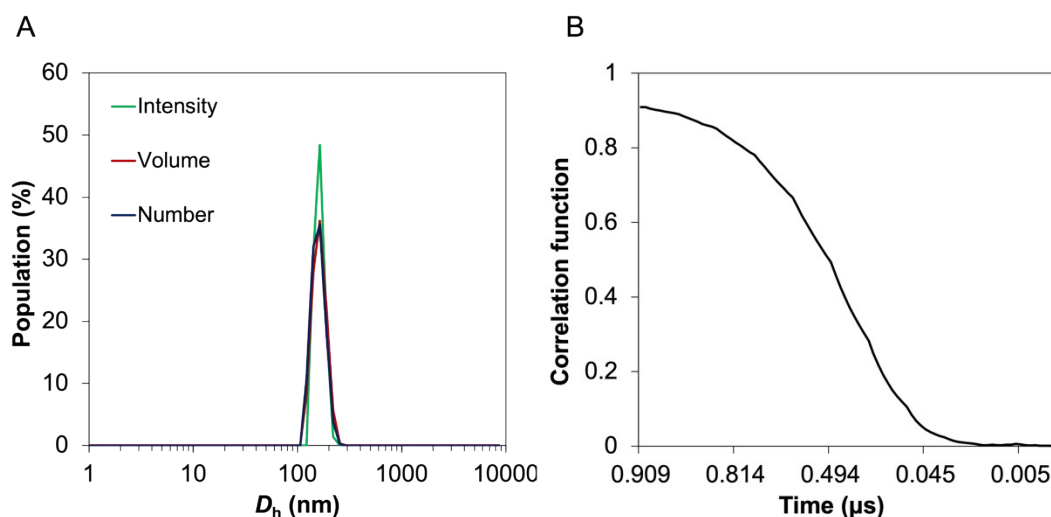

**Figure S10.** Size distribution (A) and correlation function (B) from DLS analysis show only one particle distribution for PNTC-g-CPT-g-PEG assemblies after being suspended in DMEM with 10% FBS for 72 h.

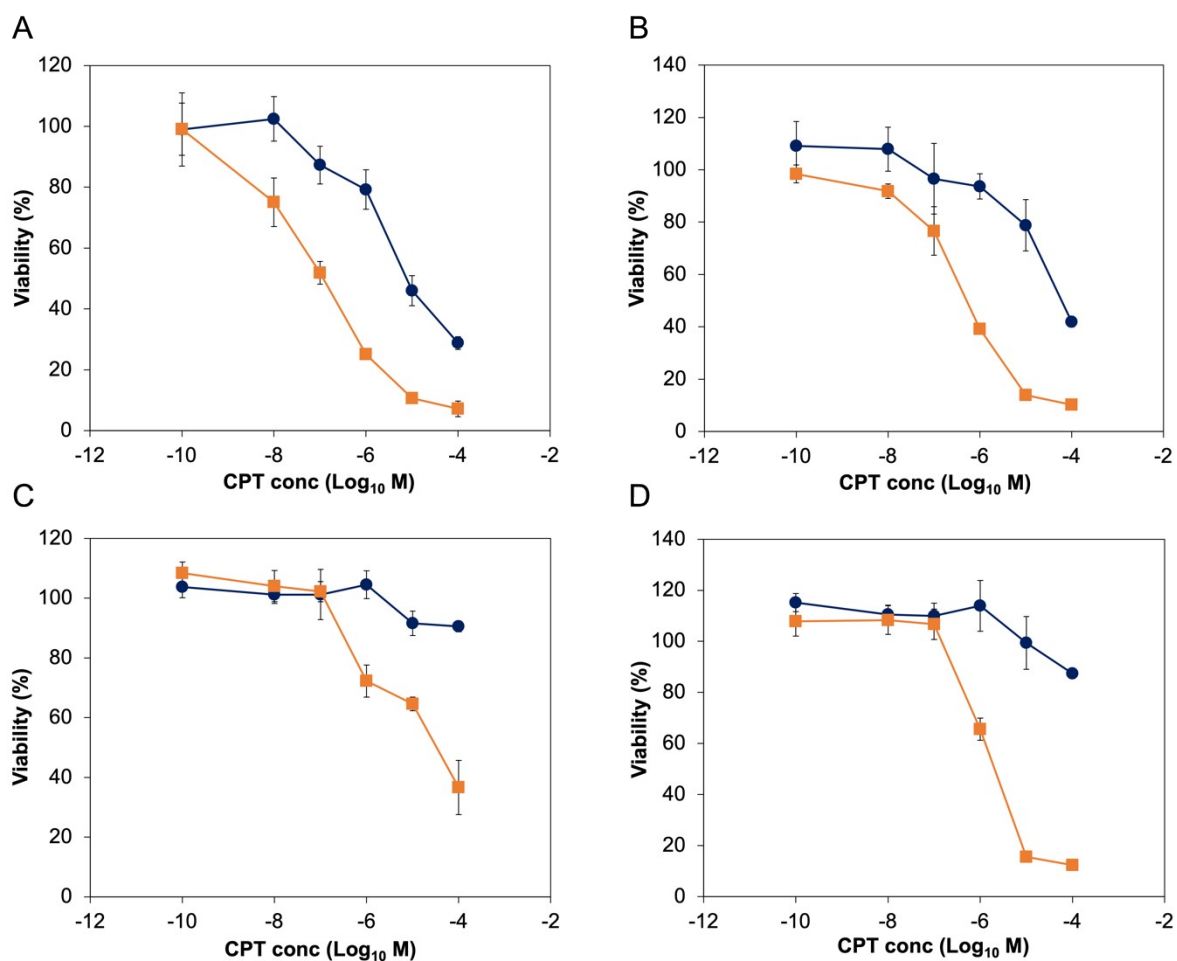

**Figure S11.** Viability of MDA-MB-468 (A) and MCF-7 (B) cancer cell lines, and 3T3 (C), and CHO-K1 (D) non-cancerous cell lines when incubated for 72 h with camptothecin azide (orange line, squared marker), PNTC-g-CPT-g-PEG (dark blue line, round marker).

**Table S2.** IC<sub>50</sub> and 95% confidence intervals for cancerous cell lines incubated with camptothecin (CPT) azide and the drug-polymer conjugate.

| Cell type  | IC <sub>50</sub> CPT azide alone (μM) | 95% confidence interval (μM)                  | IC <sub>50</sub> drug-polymer conjugate (μM) | 95% confidence interval (μM)  |
|------------|---------------------------------------|-----------------------------------------------|----------------------------------------------|-------------------------------|
| A549       | 0.184                                 | 1.4×10 <sup>-2</sup> and 2.4                  | 3.06                                         | 6.2×10 <sup>-1</sup> and 15.1 |
| PC3        | 0.068                                 | 8.2×10 <sup>-3</sup> and 5.6×10 <sup>-1</sup> | 4.48                                         | 6.4×10 <sup>-1</sup> and 31.3 |
| MCF-7      | 0.44                                  | 7.9×10 <sup>-2</sup> and 2.5                  | 6.29                                         | 1.1 and 36                    |
| MDA-MB-468 | 0.082                                 | 2.3×10 <sup>-2</sup> and 2.9×10 <sup>-1</sup> | 3.82                                         | 5.1×10 <sup>-1</sup> and 28.7 |

**Table S3.** IC<sub>50</sub> and 95% confidence intervals for non-cancerous cell lines incubated with camptothecin (CPT) azide.

| <b>Cell type</b> | <b>IC50 CPT<br/>azide alone<br/>(<math>\mu\text{M}</math>)</b> | <b>95% confidence<br/>interval (<math>\mu\text{M}</math>)</b> |
|------------------|----------------------------------------------------------------|---------------------------------------------------------------|
| IMR-90           | 0.096                                                          | $4.1 \times 10^{-3}$ and 2.3                                  |
| HS792            | 0.487                                                          | $2 \times 10^{-2}$ and 11.6                                   |
| CHOK-1           | 0.28                                                           | $7.1 \times 10^{-2}$ and 1.1                                  |
| NIH-3T3          | 9.8                                                            | $1.2 \times 10^{-1}$ and 80.3                                 |



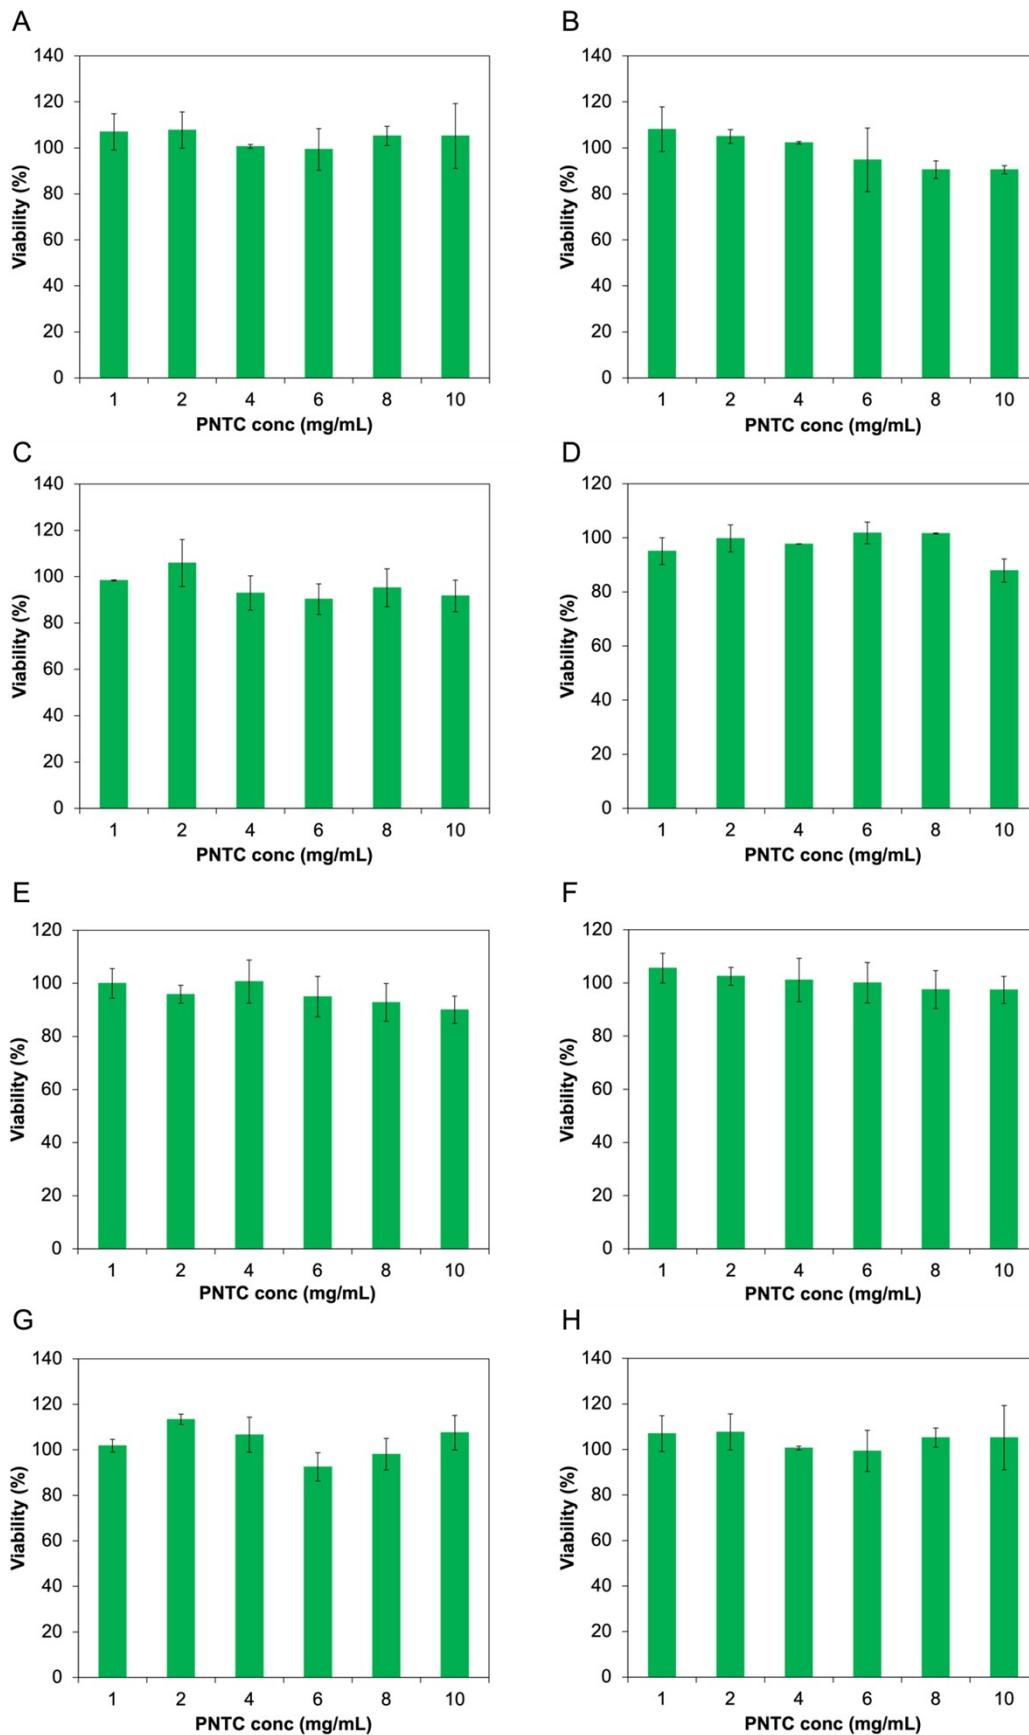

**Figure S12.** Viability of A549 (A), PC3 (B), MDA-MB-468 (C), MCF-7 (D) cancer cell lines, and IMR-90 (E), CHO-K1 (F), 3T3 (G), and HS792 (H) non-cancerous cell lines when incubated for 72 h with PNTC-g-PEG.

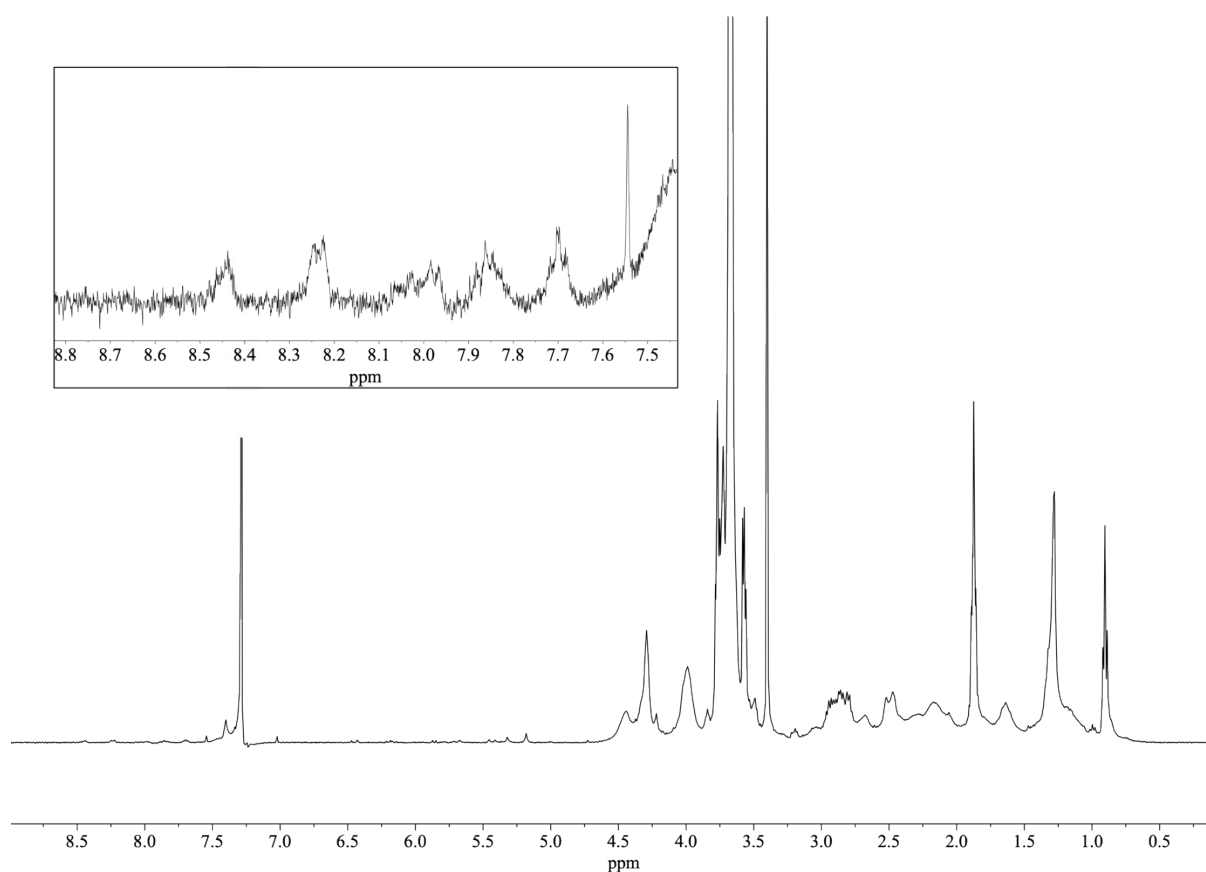

**Figure S13.**  $^1\text{H}$  NMR spectrum of PNTC-g-Cy5-g-CPT-g-PEG (500 MHz,  $\text{CDCl}_3$ ).

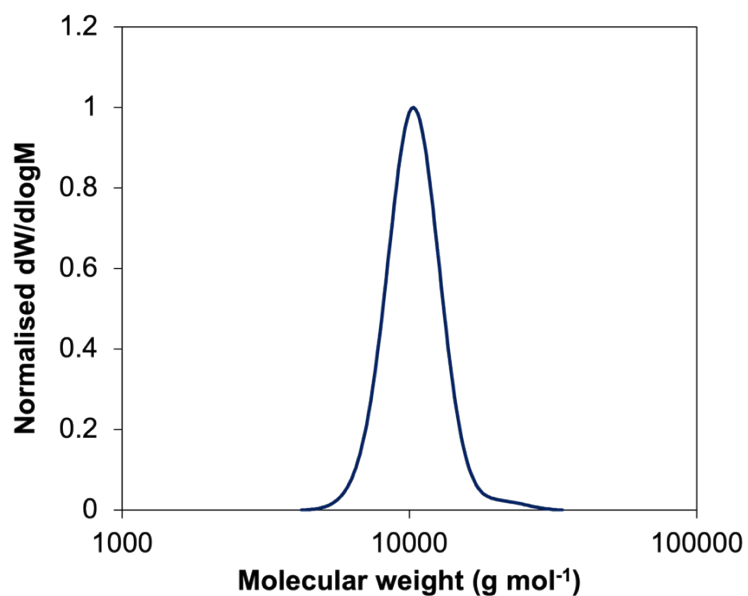

**Figure S14.** Size exclusion chromatogram of PNTC-g-Cy5-g-CPT-g-PEG conjugate (RI detection). Eluent:  $\text{CHCl}_3$ , standard: PS.

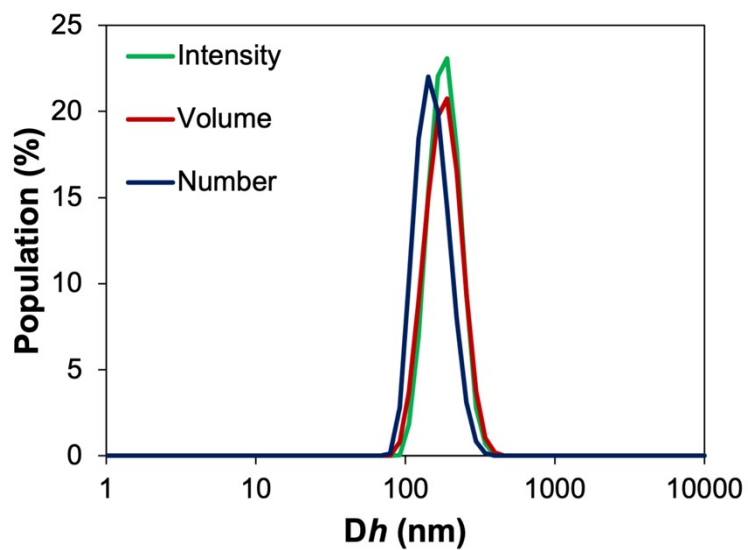

**Figure S15.** Size distribution from DLS analysis of PNTC-g-Cy5-g-CPT-g-PEG nanoparticles.

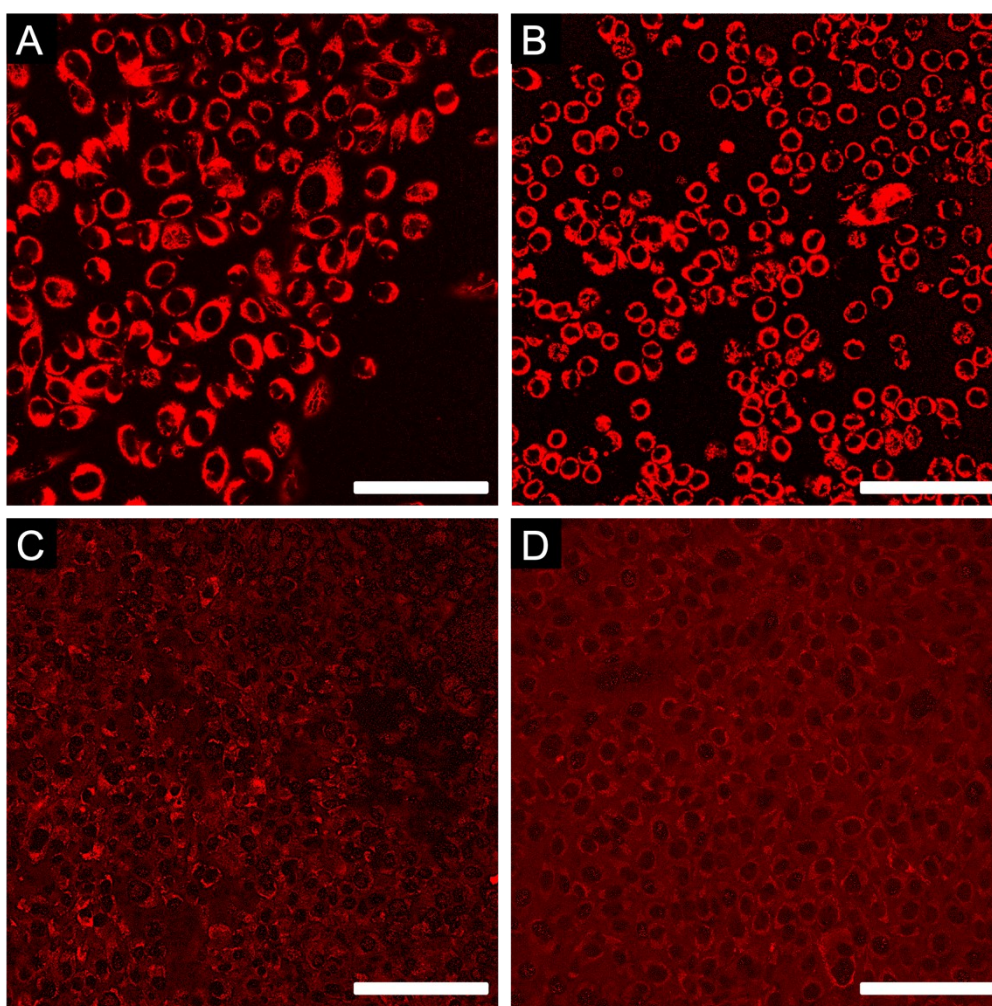

**Figure S16.** Confocal fluorescent images of PC3 (A), MDA-MB-468 (B), 3T3 (C), and CHO-K1 (D) cells incubated with PNTC-g-CPT-g-Cy5-g-PEG for 24 h. Scale bar = 10 μm.

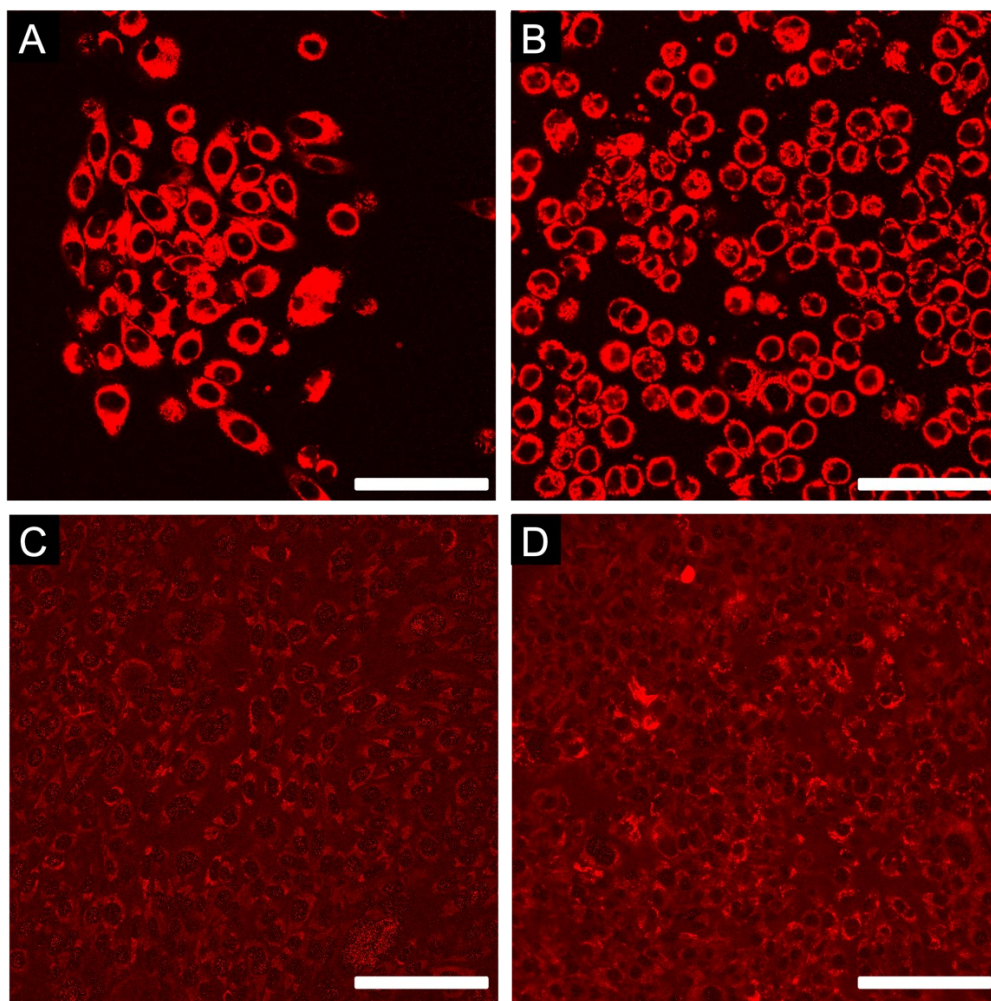

**Figure S17.** Confocal fluorescent images of PC3 (A), MDA-MB-468 (B), 3T3 (C), and CHO-K1 (D) cells incubated with PNTC-g-Cy5-g-PEG for 24 h. Scale bar = 10  $\mu$ m.
